# Supplementary material
Source: publisher figshare collection journal article supplement (https://aacr.figshare.com/articles/dataset/_/22820371)

## Supplementary Figure 2

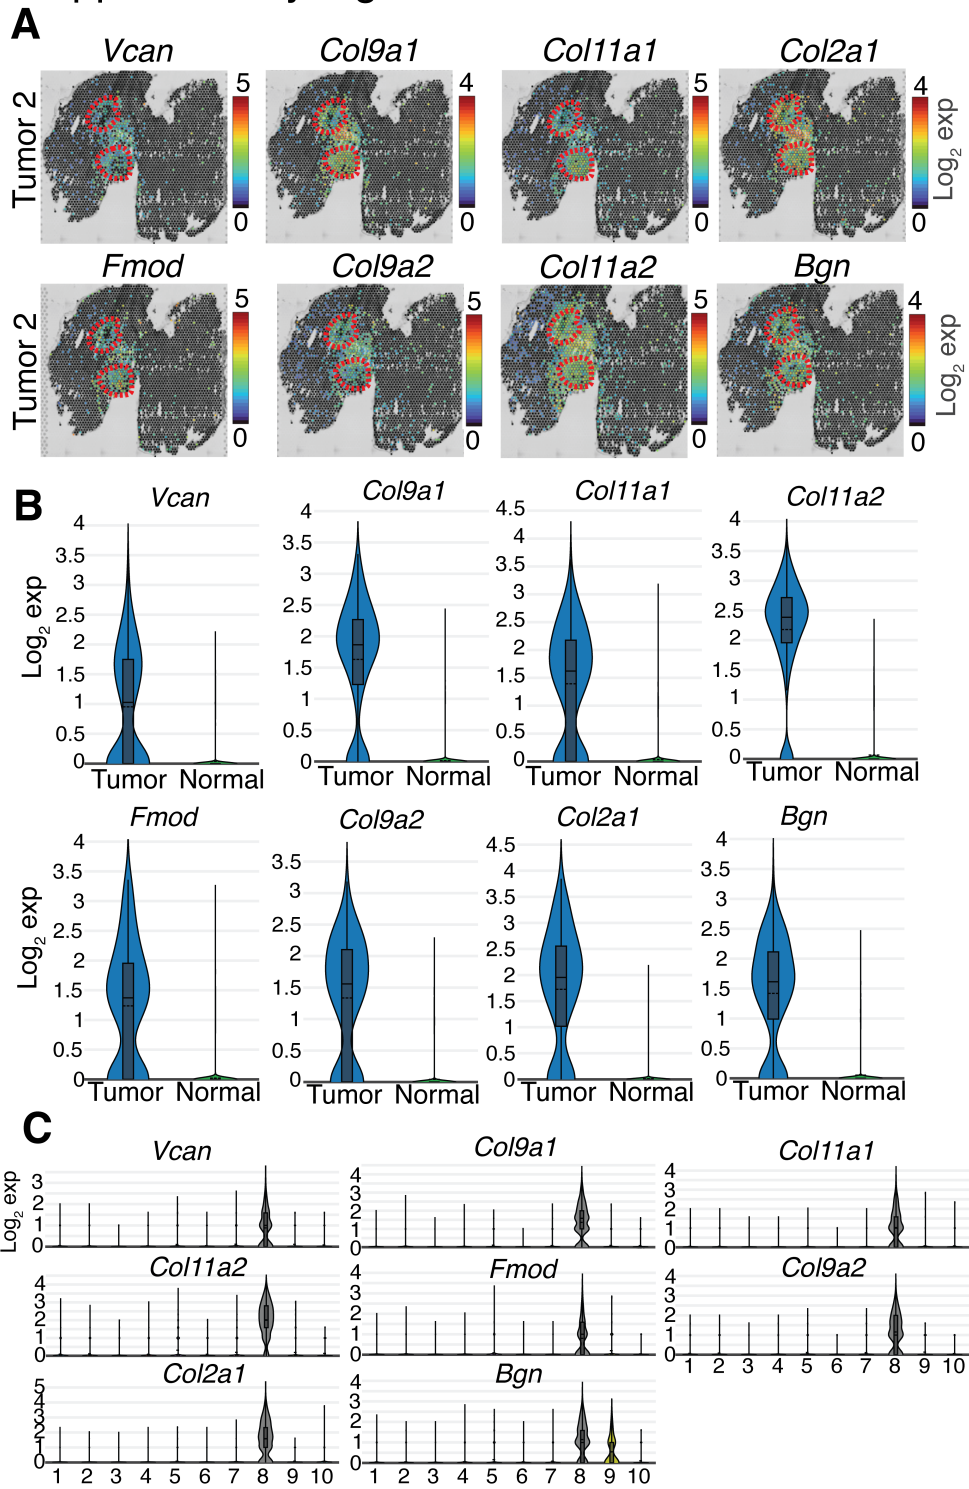

Supplement: Supplementary file 1 [file 40570642]
